# Supplementary material for: Dibromo- and Dichlorotriphenylphosphino N-Acyclic Carbene Complexes of Platinum(II)—Synthesis and Cytotoxicity
Source: MDPI journal article supplement (doi:10.3390/inorganics11090365), 2023-09-08
Supplement: s1 [file s1]

# **"Dibromo- and dichlorotriphenylphosphino N-acyclic carbene complexes of platinum(II). Synthesis and antiproliferative properties"**

## **Supplementary Information**

Figure S1.  $^1\text{H}$  NMR spectrum of complex **1**.

Figure S2.  $^{31}\text{P}$  NMR spectrum of complex **1**.

Figure S3.  $^{195}\text{Pt}$  NMR spectrum of complex **1**.

Figure S4.  $^1\text{H}$  NMR spectrum of complex **2**.

Figure S5.  $^{31}\text{P}$  NMR spectrum of complex **2**.

Figure S6.  $^{195}\text{Pt}$  NMR spectrum of complex **2**.

Figure S7.  $^1\text{H}$  NMR spectrum of complex **3**.

Figure S8.  $^{31}\text{P}$  NMR spectrum of complex **3**.

Figure S9.  $^{195}\text{Pt}$  NMR spectrum of complex **3**.

Figure S10.  $^1\text{H}$  NMR spectrum of complex **4**.

Figure S11.  $^{31}\text{P}$  NMR spectrum of complex **4**.

Figure S12.  $^{195}\text{Pt}$  NMR spectrum of complex **4**.

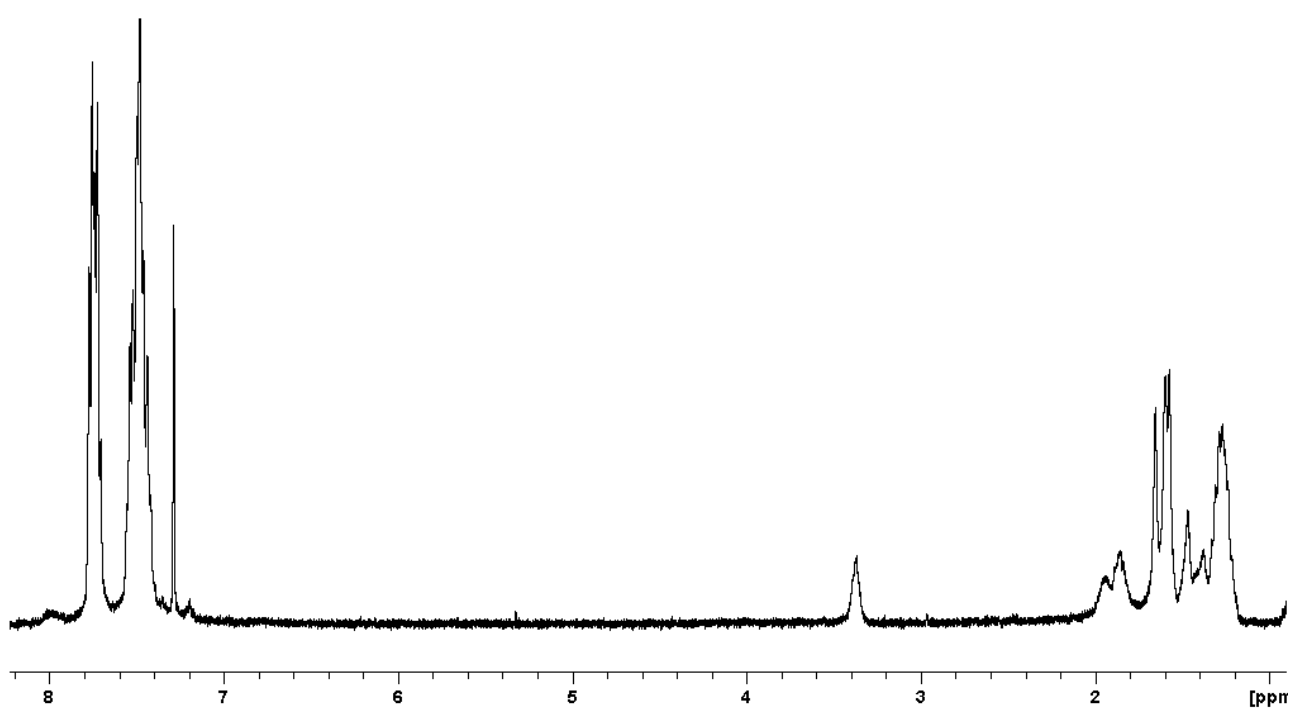

Figure S1.  $^1\text{H}$  NMR spectrum of complex **1**

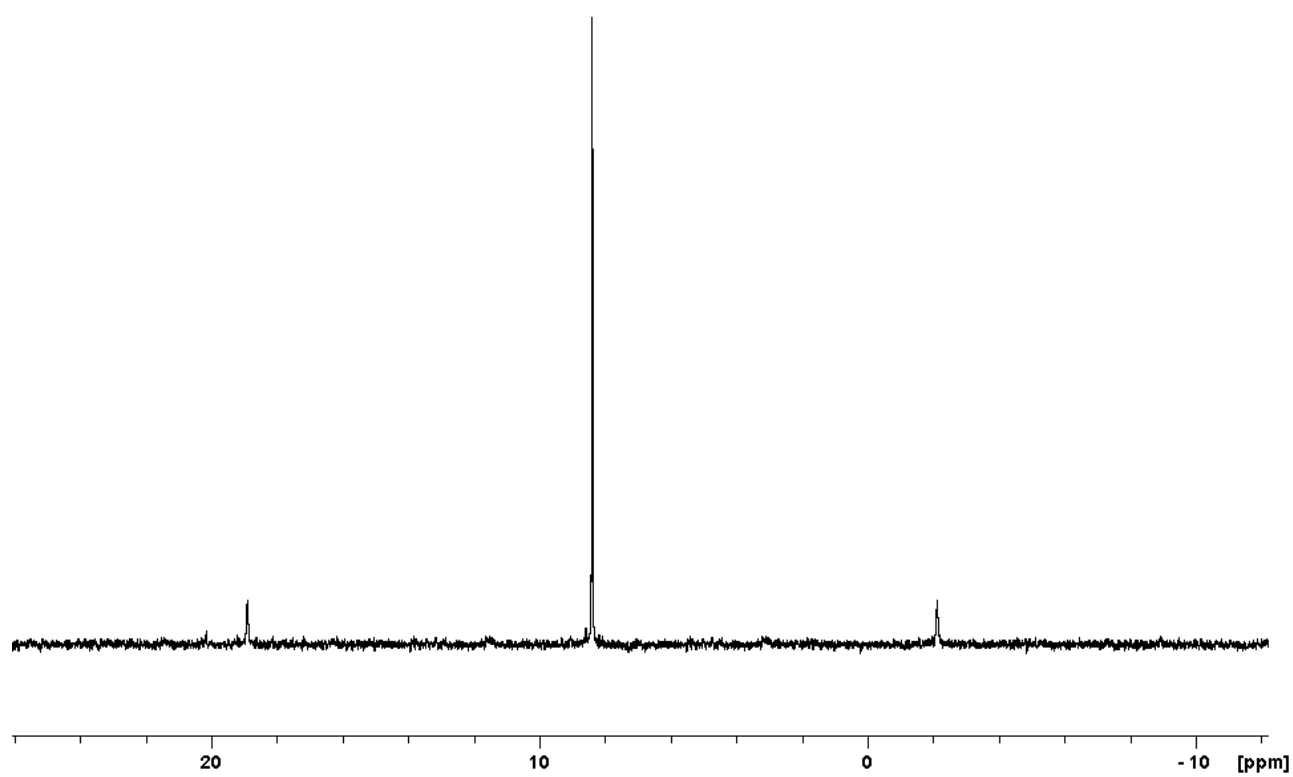

Figure S2.  $^{31}\text{P}$  NMR spectrum of complex **1**

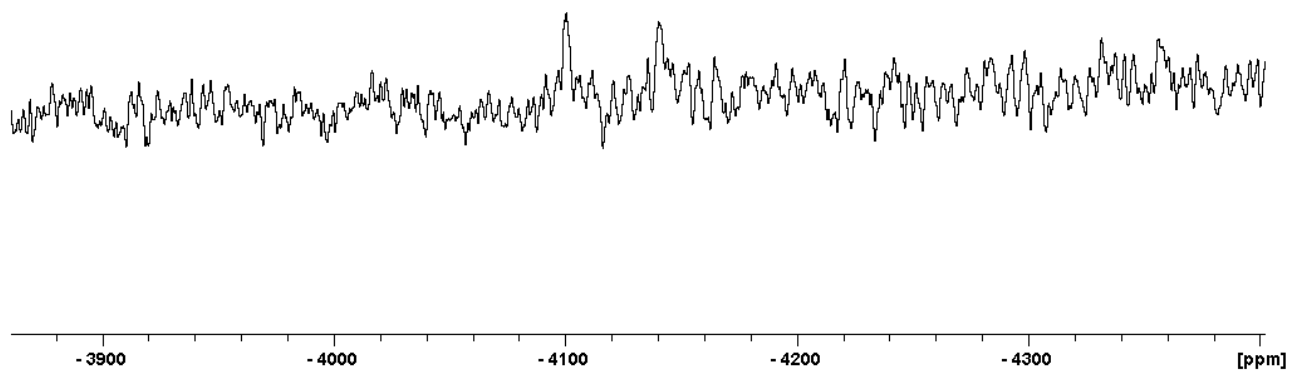

Figure S3.  $^{195}\text{Pt}$  NMR spectrum of complex **1**

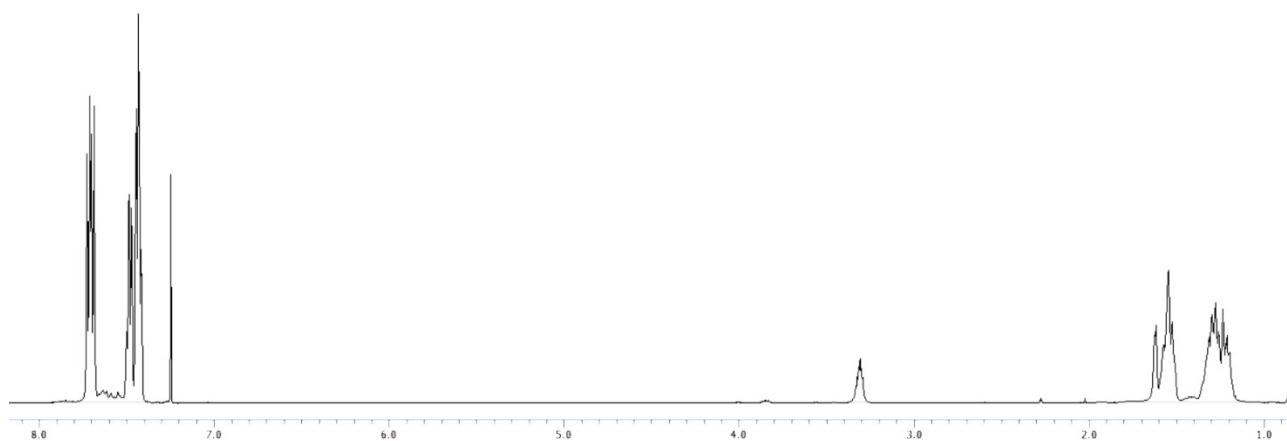

Figure S4.  $^1\text{H}$  NMR spectrum of complex **2**

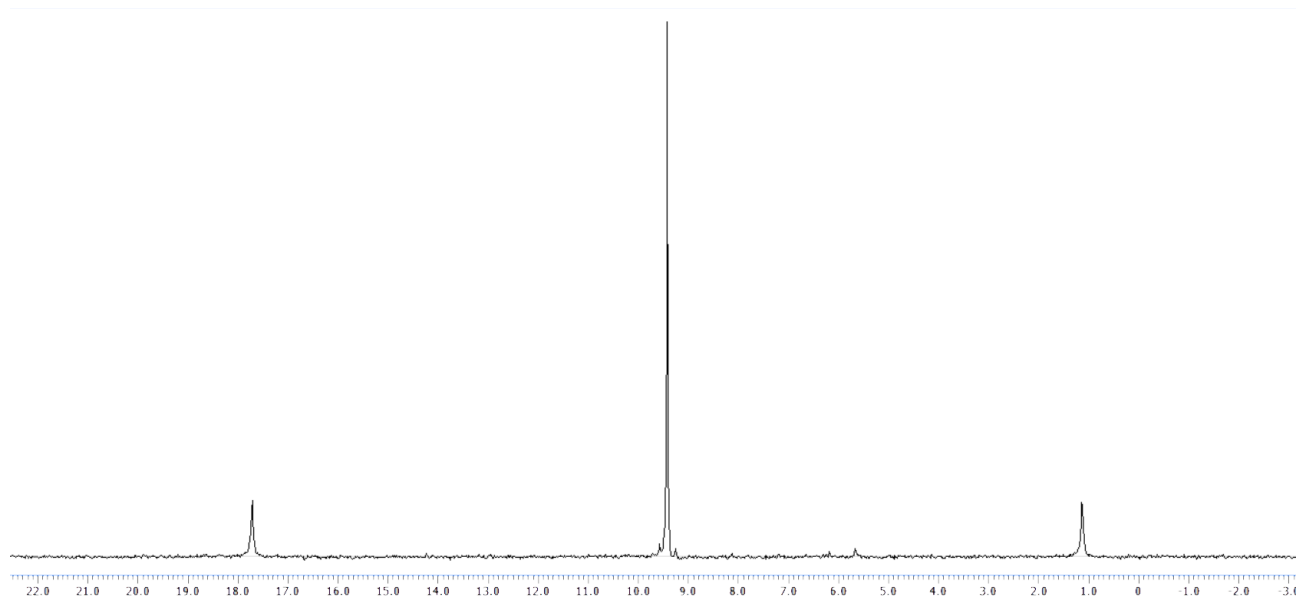

Figure S5.  $^{31}\text{P}$  NMR spectrum of complex **2**

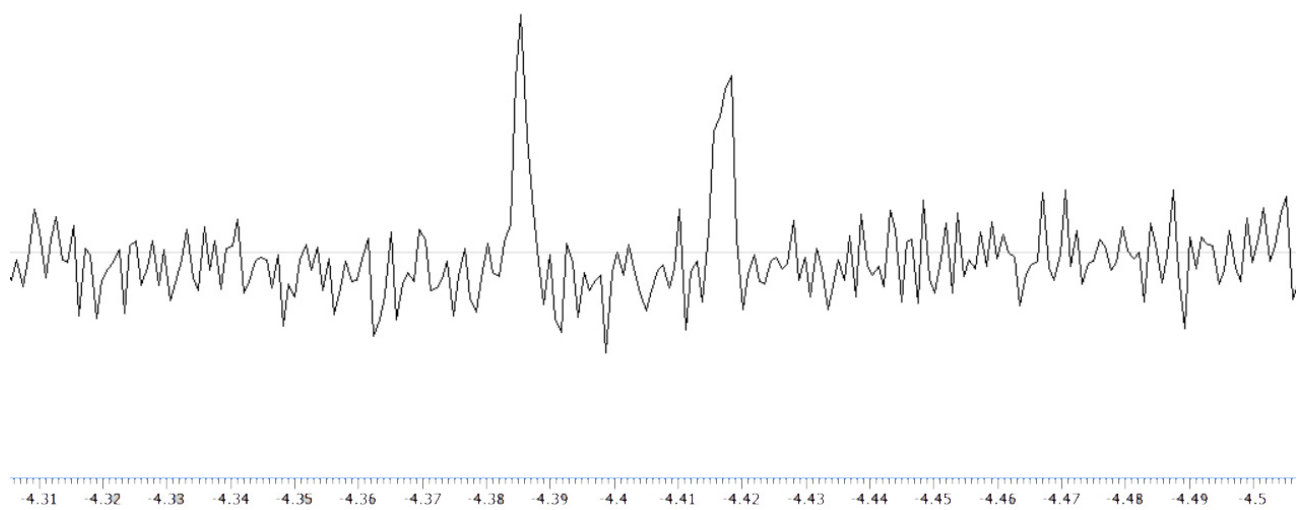

Figure S6.  $^{195}\text{Pt}$  NMR spectrum of complex **2**

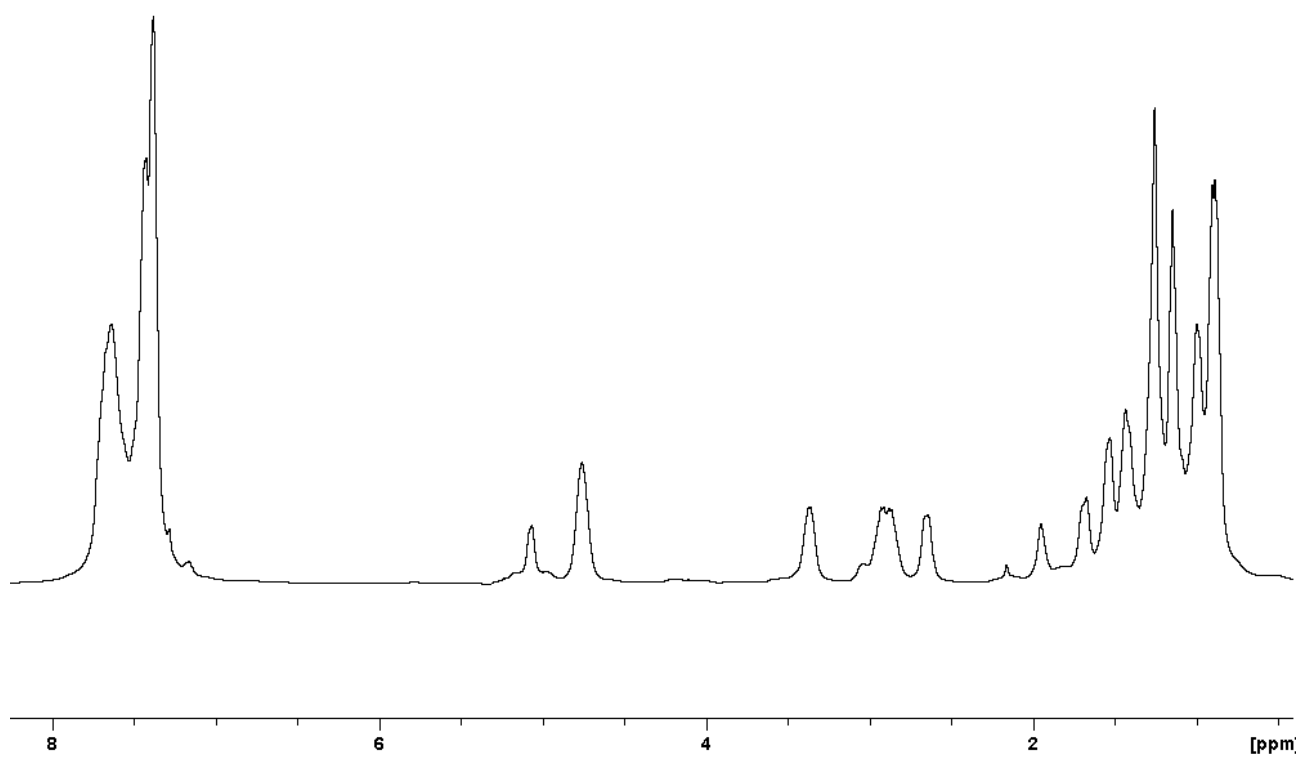

Figure S7.  $^1\text{H}$  NMR spectrum of complex **3**

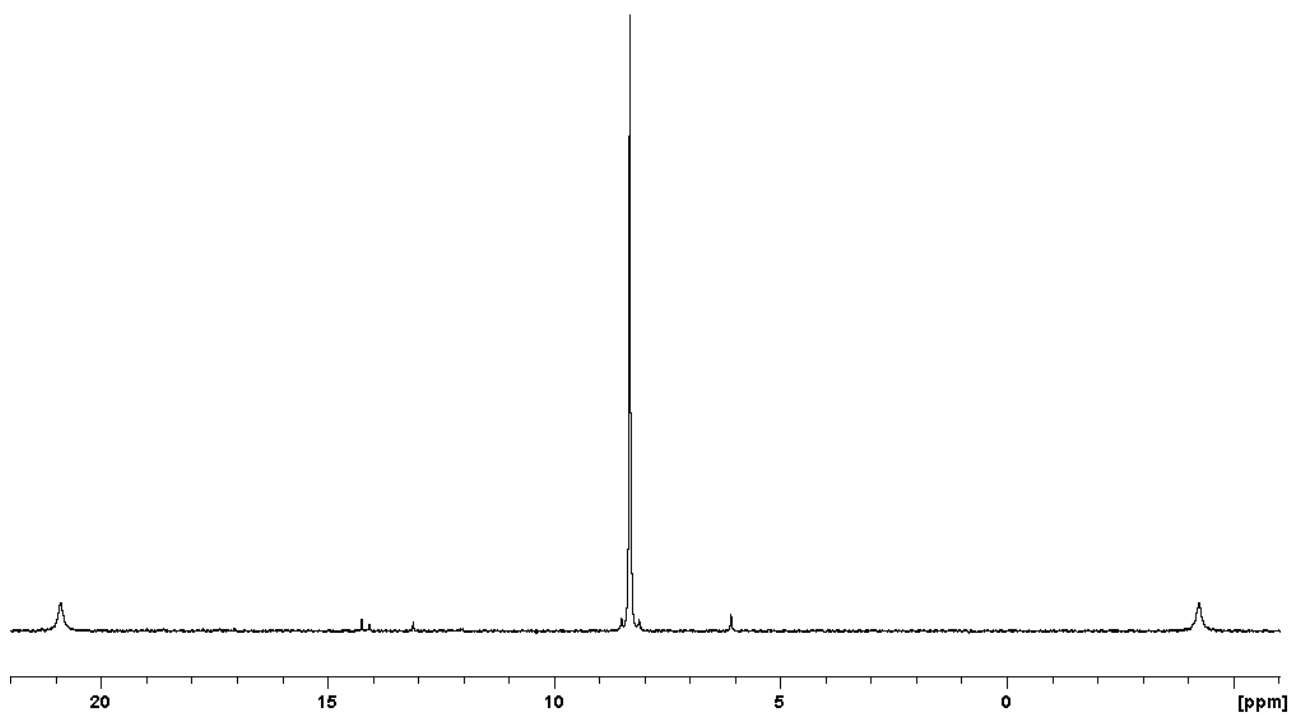

Figure S8.  $^{31}\text{P}$  NMR spectrum of complex **3**

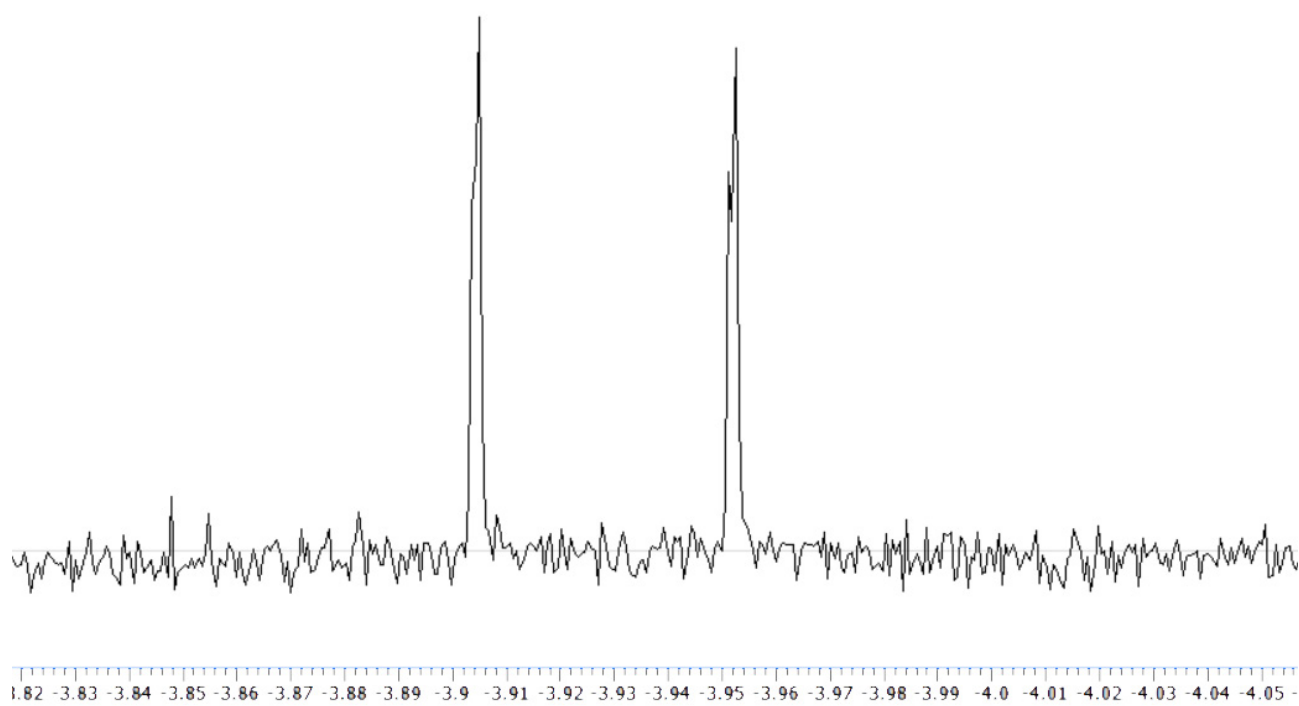

Figure S9.  $^{195}\text{Pt}$  NMR spectrum of complex **3**

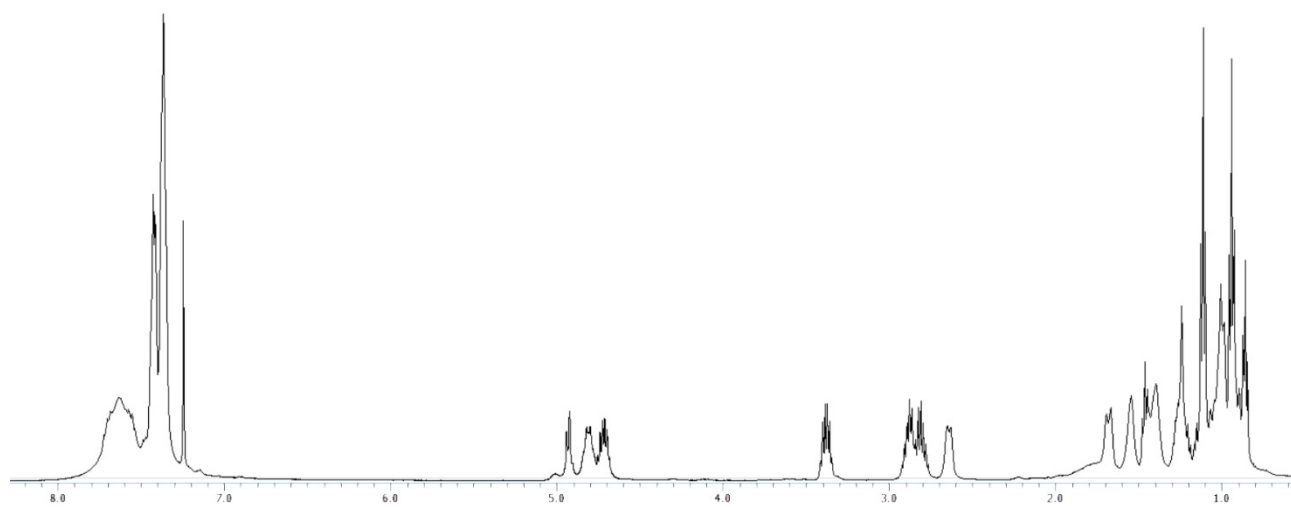

Figure S10.  $^1\text{H}$  NMR spectrum of complex **4**

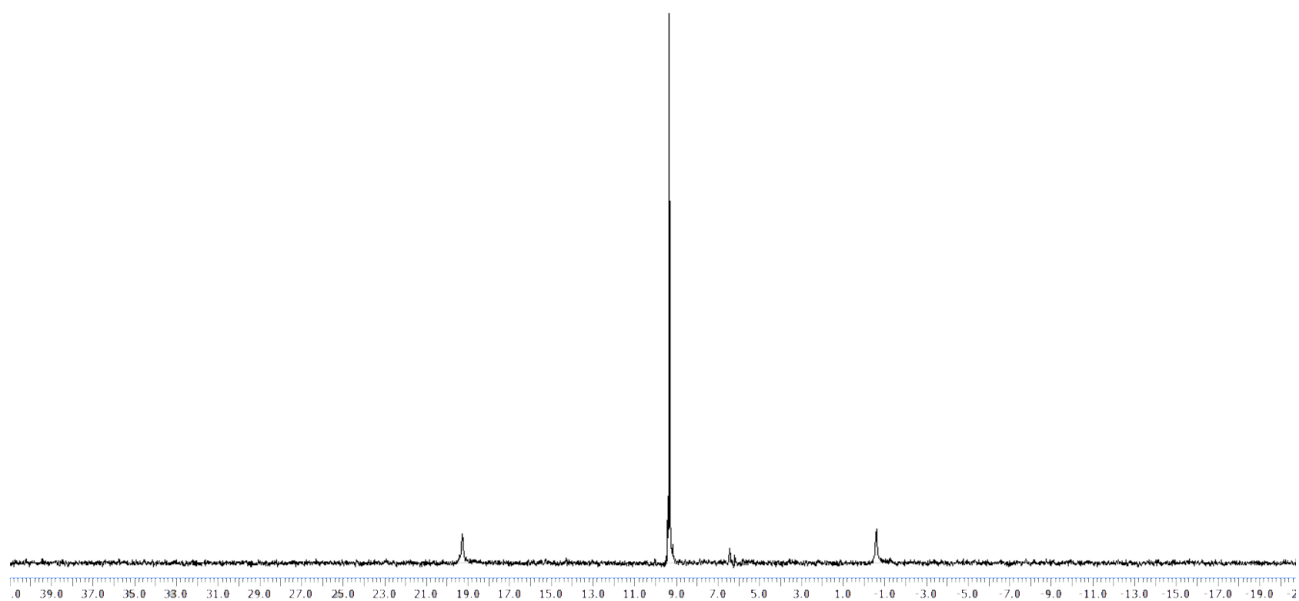

Figure S11.  $^{31}\text{P}$  NMR spectrum of complex **4**

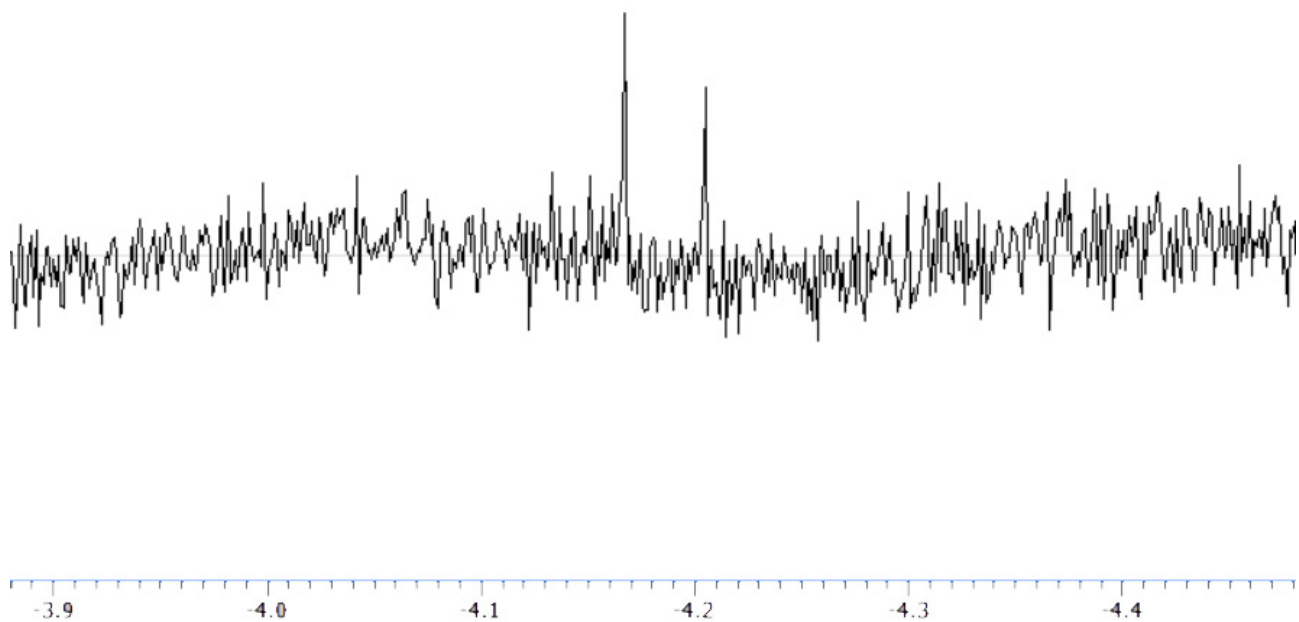

Figure S12.  $^{195}\text{Pt}$  NMR spectrum of complex **4**
